# Supplementary material for: Tissue-resident memory T cells break tolerance to renal autoantigens and orchestrate immune-mediated nephritis
Source: PubMed Central journal article supplement (PMC11364874; doi:10.1038/s41423-024-01197-z), 2024-07-03
Supplement: 41423_2024_1197_MOESM1_ESM.pdf [file 41423_2024_1197_MOESM1_ESM.pdf]

## **Supplementary Material for**

# **Tissue-resident memory T cells break tolerance to renal autoantigens and orchestrate immune-mediated nephritis**

Frederic Arnold, Laurence Kupferschmid, Philipp Weissenborn, Lukas Heldmann, Jonas F. Hummel,  
Paulina Zareba, Sagar, Manuel Rogg, Christoph Schell, Yakup Tanriver

### **Supplementary Material**

Supplementary Figures S1 – S13

Supplementary Tables S1 – S5

References

Supplementary Figures

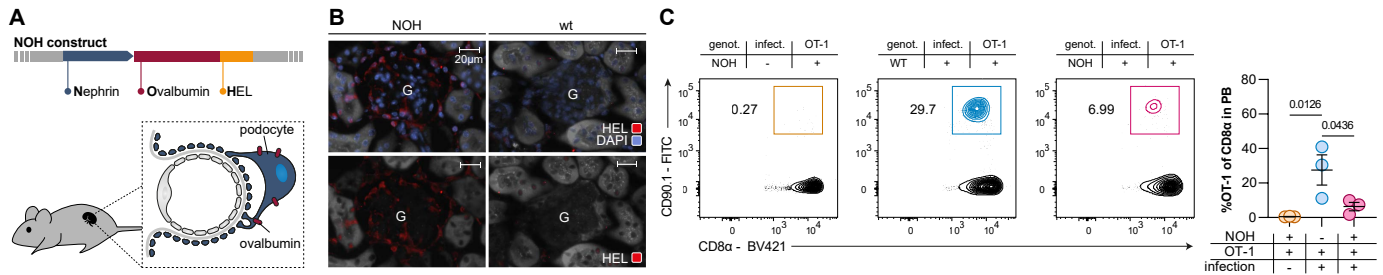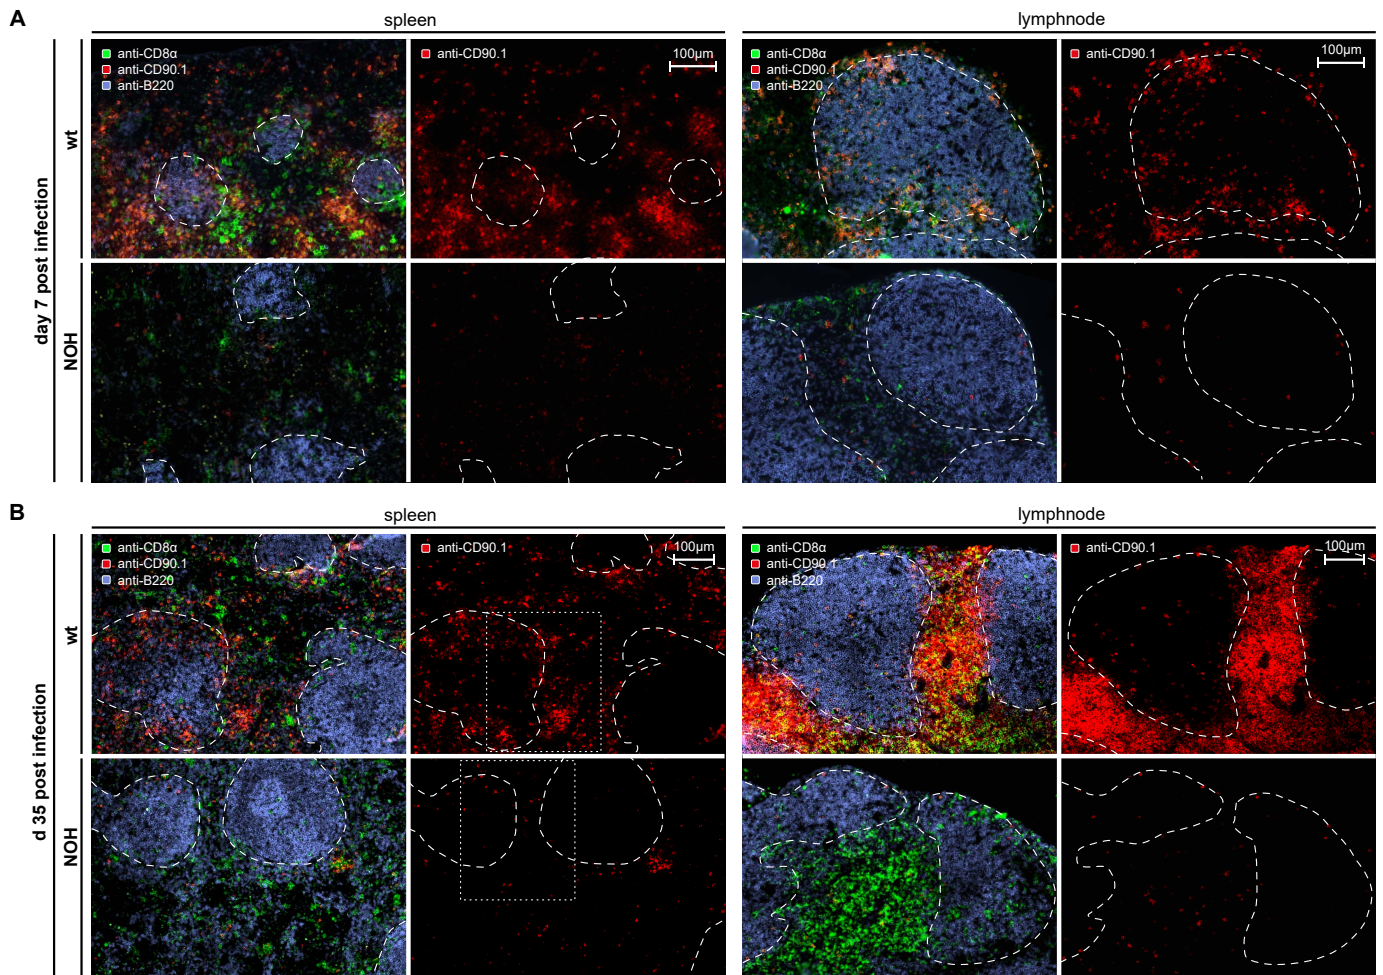

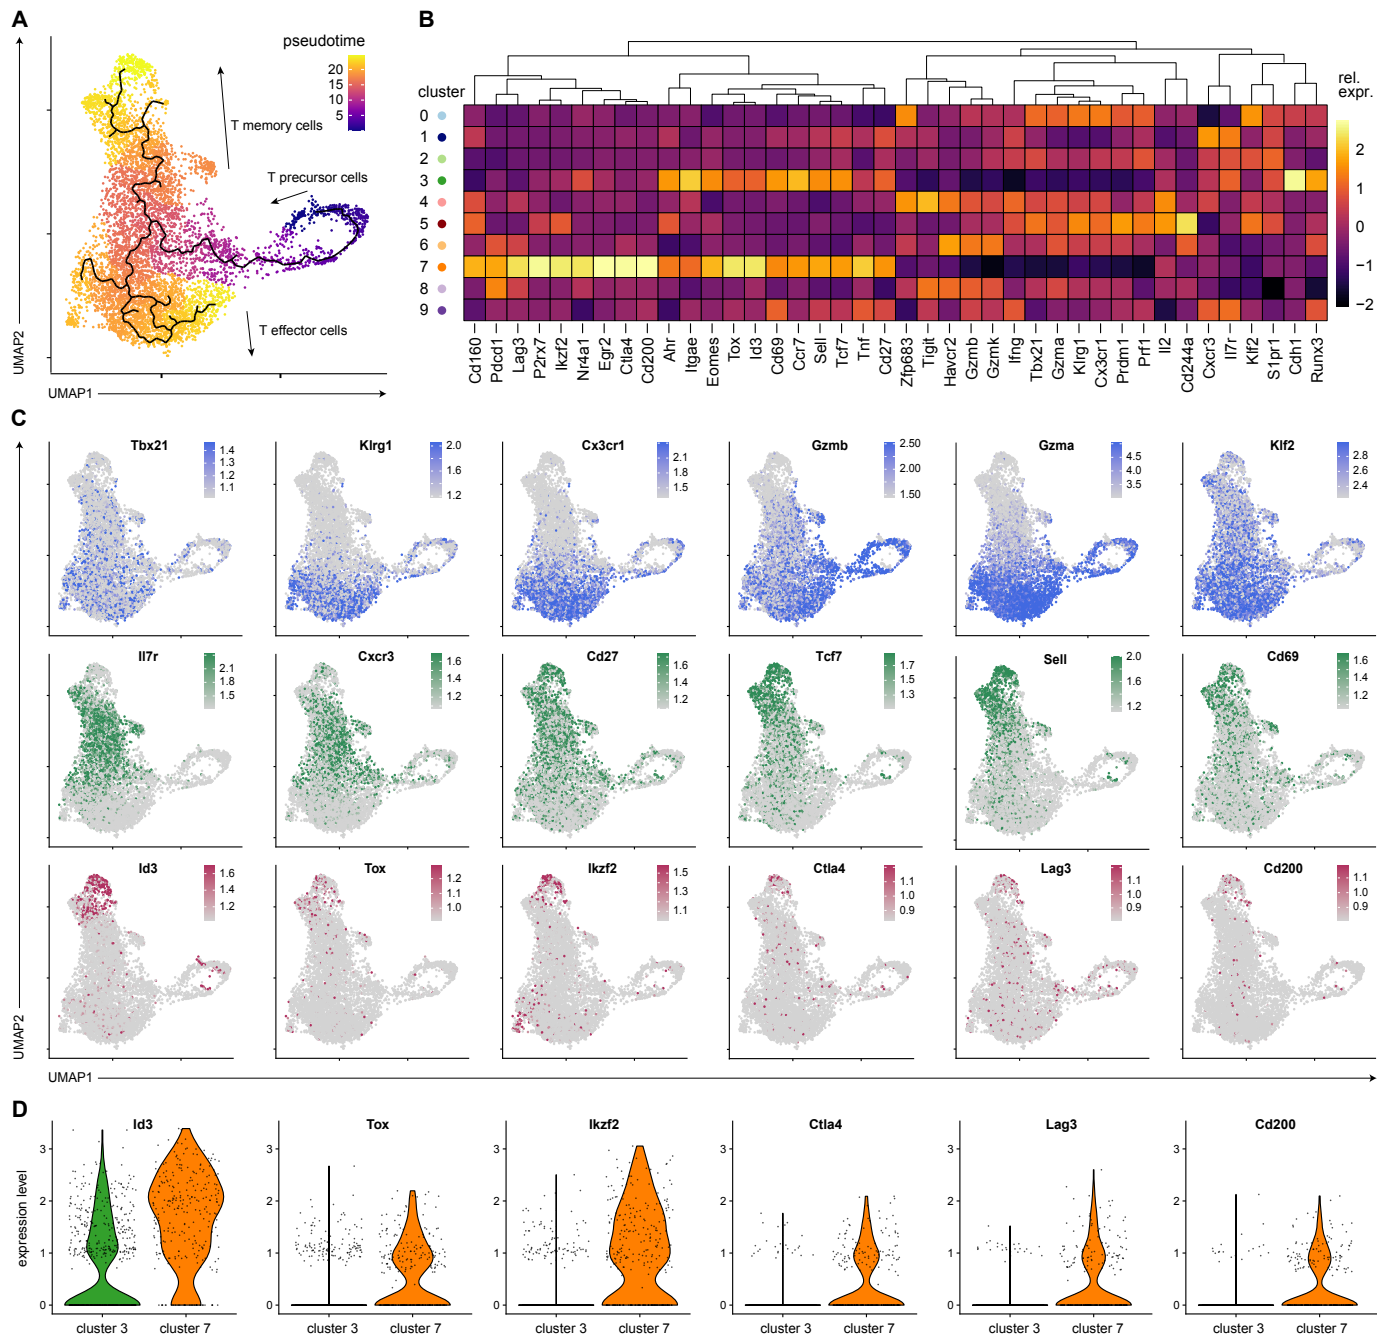

**Figure S3.** (A) Pseudotemporal ordering of single cells indicating differentiation of T effector (bottom) and T memory (top) cells from common precursors. (B) Heatmap illustrating relative expression of curated features. (C) UMAP feature plots showing expression of curated T cell activation/effector (upper row, blue), memory (central row, green) and inhibitory (lower row, red) markers (corresponding to Fig. 1, K and L). (D) Differential expression of selected T cell inhibitory genes comparing clusters 3 and 7. Corresponding to Fig. 1L.

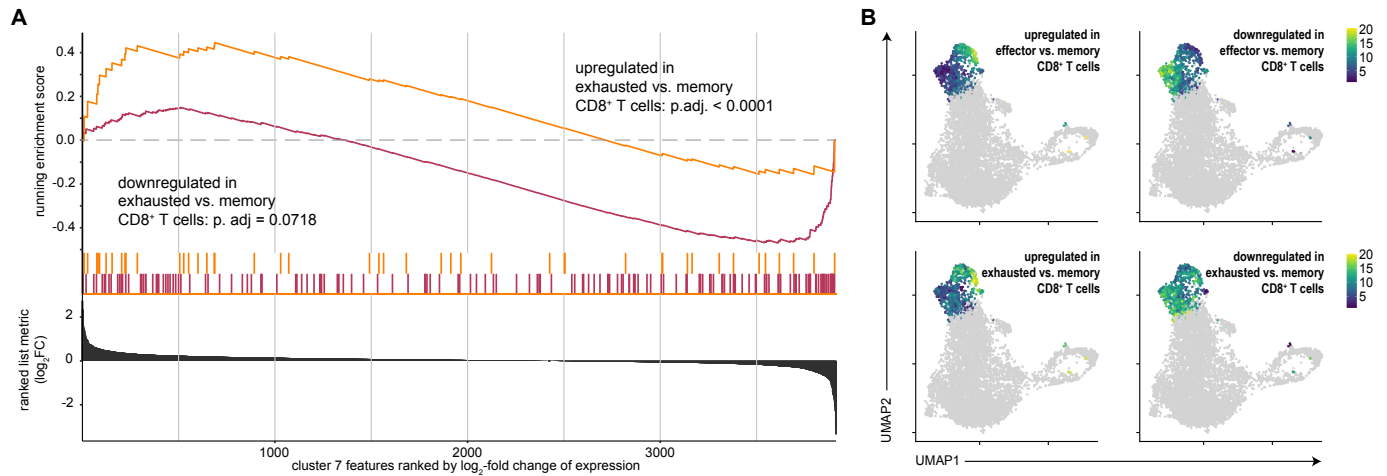

**Figure S4.** (A) Gene set enrichment plot for ranked expression of cluster 7 features, enriched in GSE9650 exhausted vs. memory CD8<sup>+</sup> T cell analysis. Graphs show the running enrichment score (ES), barcodes the positions of gene set members on the rank-ordered gene list. (B) Feature expression plots depicting the UCell single-cell gene signature scoring of the GSE9650 effector vs. memory CD8<sup>+</sup> T cell analysis (upper row) and the GSE9650 exhausted vs. memory CD8<sup>+</sup> T cell analysis in clusters 3 and 7.

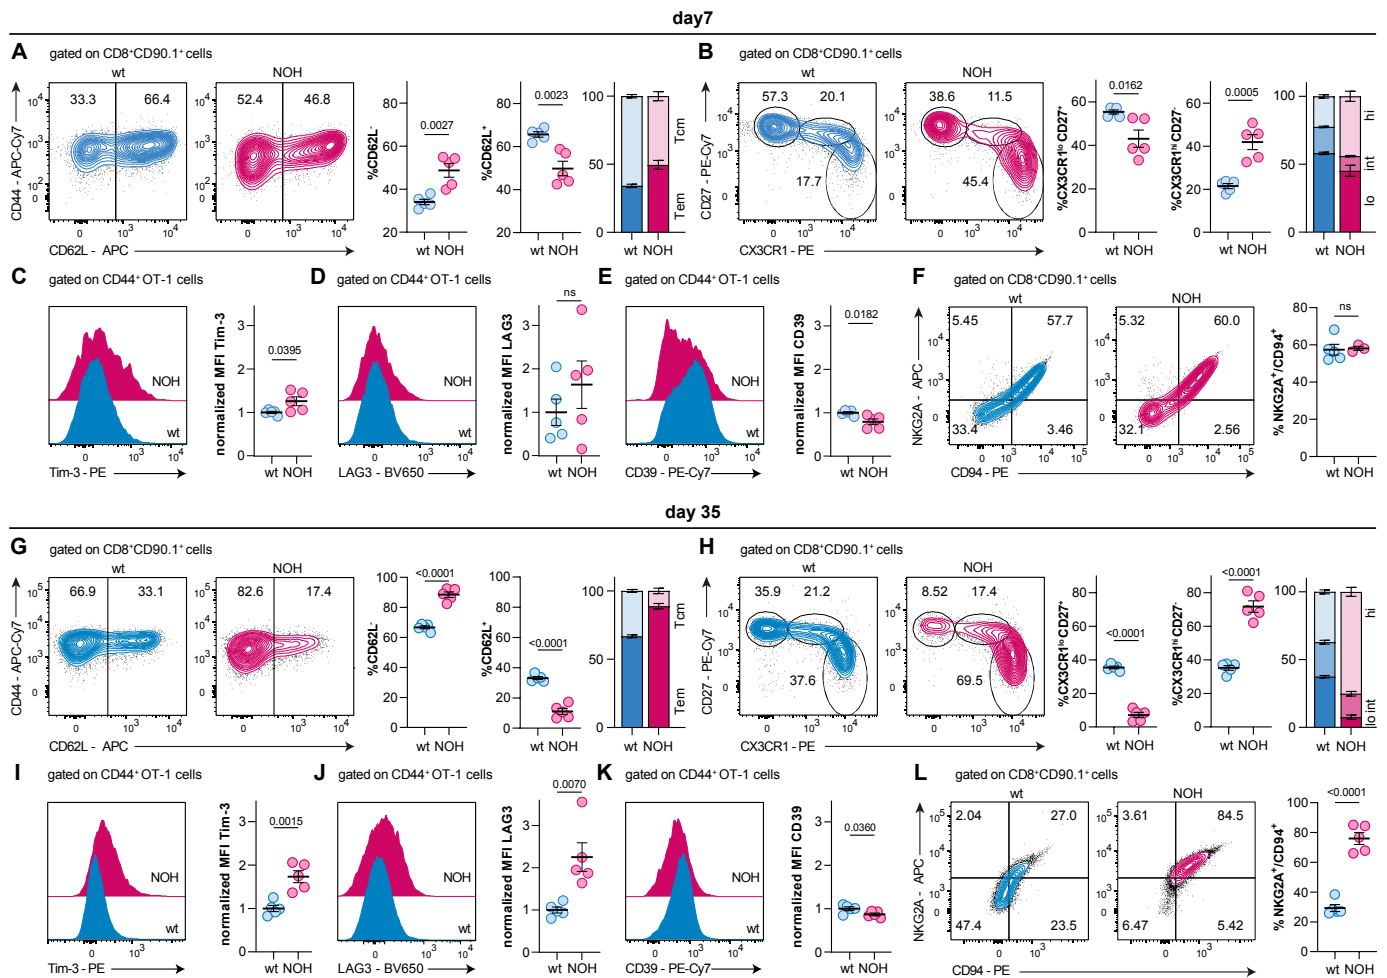

**Figure S5.** Flow cytometry analysis of splenocytes 7 (A-F) and 35 days (G-L) after adoptive OT-1 cell transfer and infection. (A, G) Representative flow cytometry plots illustrating CD44 and CD62L expression of transferred OT-1 cells. Dot plots and stacked bar plot depicting higher percentage of CD62L<sup>+</sup> T<sub>EM</sub> OT-1 cells in NOH (red) vs. wt mice (blue) on day 7 (A) and day 35 (G). (B, H) Representative flow cytometry plots illustrating CD27 and CX3CR1 expression of transferred OT-1 cells. Dot plots and stacked bar plot depicting higher percentage of CX3CR1<sup>hi</sup>CD27<sup>+</sup> OT-1 cells in NOH (red) vs. wt mice (blue) on day

7 (B) and day 35 (H). (C, I) Representative histograms illustrating Tim-3 expression of transferred OT-1 cells. Dot plot comparing normalized MFIs, showing higher Tim-3 expression in OT-1 cells from NOH (red) vs. wt mice (blue) on day 7 (C) and day 35 (I). (D, J) Representative histograms illustrating LAG3 expression of transferred OT-1 cells. Dot plot comparing normalized MFIs, showing higher LAG3 expression in OT-1 cells from NOH (red) vs. wt mice (blue) only on day 35 (J). (E, K) Representative histograms illustrating CD39 expression of transferred OT-1 cells. Dot plot comparing normalized MFIs, showing lower CD39 expression in OT-1 cells from NOH (red) vs. wt mice (blue) on day 7 (E) and day 35 (K). (F, L) Representative flow cytometry plots illustrating expression of CD94/NKG2A complex on transferred OT-1 cells. Dot plot showing higher expression in OT-1 cells from NOH (red) vs. wt mice (blue) only on day 35 (L). Bars and whiskers of dot plots depict means and respective standard errors of the mean (SEM). P-values were calculated using unpaired student's t test. All presented datasets are representative of at least 3 individual experiments with  $n=5$  mice per group. Normalized MFIs were calculated by dividing the MFIs of each sample by the mean MFI of the respective wt group.

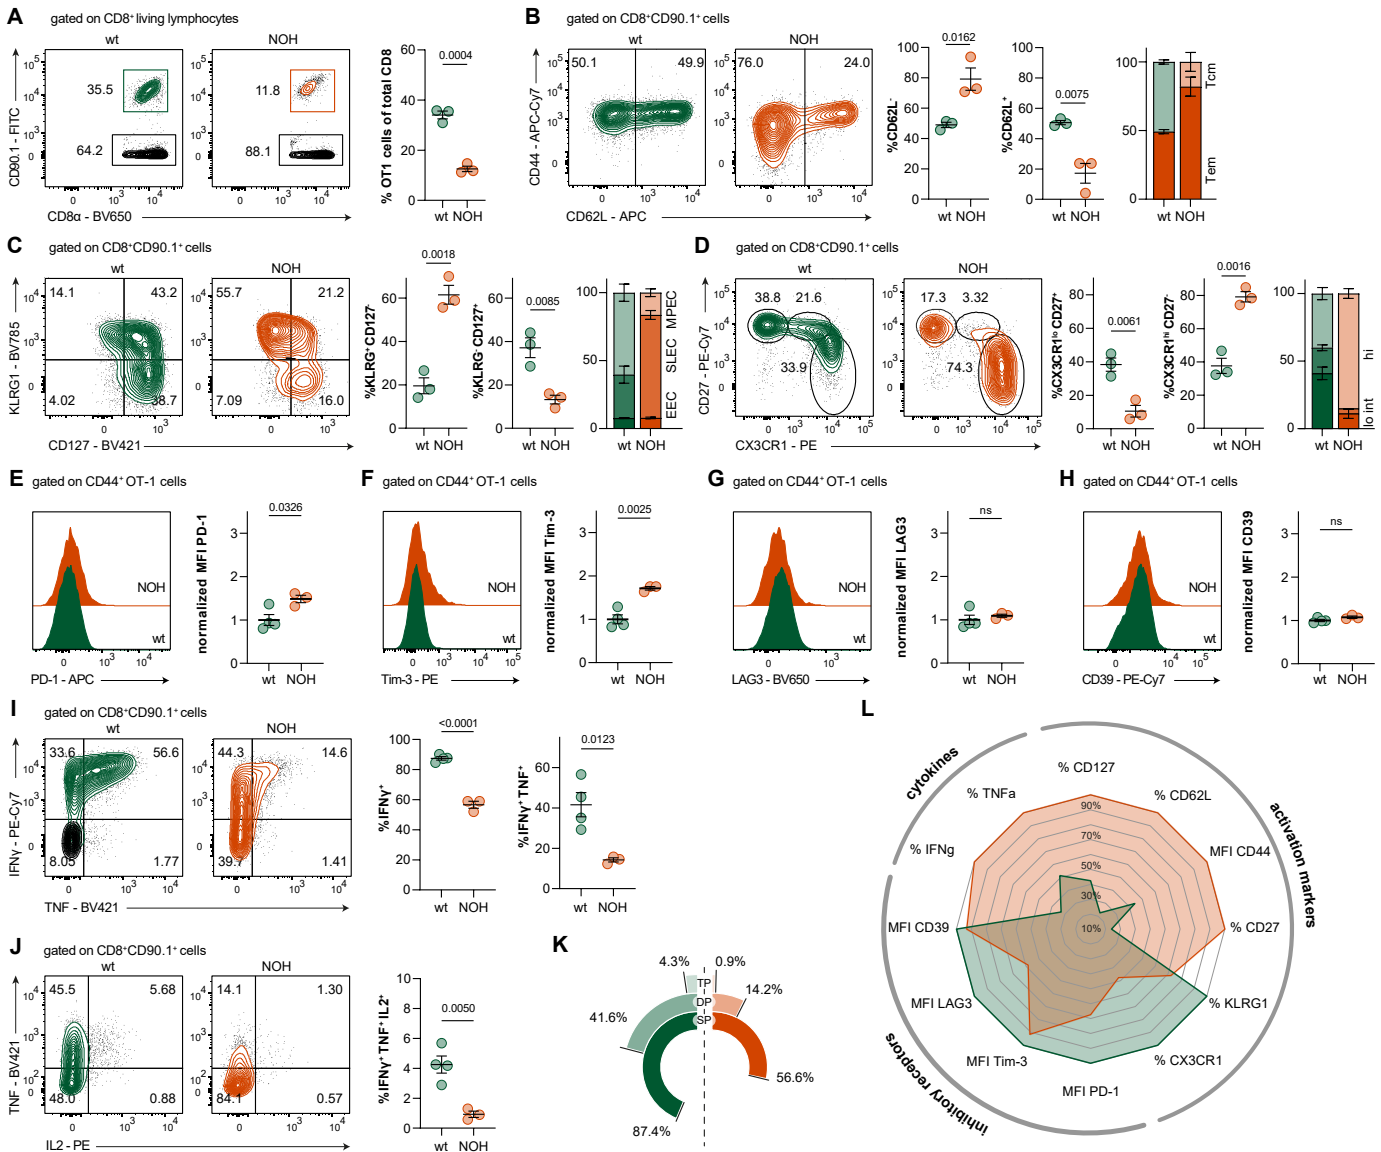

**Figure S6.** Flow cytometry analysis of splenocytes 35 days after OT-1 transfer and homologous prime-boost infection (d0: 2,500 cfu LM-OVA; d21: 250,000 cfu LM-OVA). (A) Representative flow cytometry plots discriminating transferred OT-1 cells from native CD8<sup>+</sup> T cells (CD90.1<sup>+</sup>) in splenocyte suspensions. Dot plot (right) showing significantly lower OT-1 cell fractions in NOH (orange) compared to wt mice (green), 35 days after homologous prime-boost infection. (B) Representative flow cytometry plots illustrating CD44 and CD62L expression of transferred OT-1 cells. Dot plots and stacked bar plot depicting higher percentage of CD62L<sup>+</sup> T effector memory (T<sub>EM</sub>) OT-1 cells in NOH (orange) vs. wt mice (green). (C) Representative flow cytometry plots illustrating KLRG1 and CD127 expression of transferred OT-1 cells. Dot plot and stacked bar plot depicting higher percentage of KLRG1<sup>+</sup> CD127<sup>-</sup> short lived effector OT-1 cells, compared to KLRG1<sup>-</sup> CD127<sup>+</sup> memory precursor OT-1 cells in NOH (orange) vs. wt mice (green). (D) Representative flow cytometry plots illustrating CD27 and CX3CR1 expression of transferred OT-1 cells. Dot plots and stacked bar plot depicting higher percentage of CX3CR1<sup>hi</sup>CD27<sup>-</sup> OT-1 cells in NOH (orange) vs. wt mice (green). (E) Representative

histograms illustrating PD-1 expression of transferred OT-1 cells. Dot plot comparing normalized MFIs, showing higher PD-1 expression in OT-1 cells from NOH (orange) vs. wt mice (green). **(F)** Representative histograms illustrating Tim-3 expression of transferred OT-1 cells. Dot plot comparing normalized MFIs, showing higher Tim-3 expression in OT-1 cells from NOH (orange) vs. wt mice (green). **(G)** Representative histograms illustrating LAG3 expression of transferred OT-1 cells. Dot plot comparing normalized MFIs, showing no significant difference of LAG3 expression in OT-1 cells from NOH (orange) vs. wt mice (green). **(H)** Representative histograms illustrating CD39 expression of transferred OT-1 cells. Dot plot comparing normalized MFIs, showing no significant difference of CD39 expression in OT-1 cells from NOH (orange) vs. wt mice (green). **(I)** Flow cytometry plots illustrating interferon- $\gamma$  (IFN $\gamma$ ) and tumor necrosis factor (TNF) production of transferred OT-1 cells after *in vitro* restimulation with  $10^{-6}$  M SIINFEKL peptide; cytokine excretion blocked with brefeldin A. Dot plots showing lower fractions of IFN $\gamma^+$  and IFN $\gamma^+$ TNF $^+$  double positive OT-1 cells in NOH (orange) vs. wt mice (green). **(J)** Flow cytometry plots illustrating tumor necrosis factor (TNF) and IL2 production of transferred IFN $\gamma^+$  OT-1 cells after *in vitro* restimulation. Dot plots indicating lower fractions of IL2 $^+$ IFN $\gamma^+$ TNF $^+$  triple positive OT-1 cells in NOH (orange) vs. wt mice (green). **(K)** Radial charts comparing cytokine production of OT-1 cells in NOH (orange) vs. wt mice (green). SP: single positive (IFN $\gamma^+$ ); DP: double positive, (IFN $\gamma^+$ TNF $^+$ ); TP: triple positive: (IL2 $^+$ IFN $\gamma^+$ TNF $^+$ ). **(L)** Spider graph summarizing relative expression of activation markers, inhibitory receptors and cytokine production. Bars and whiskers of dot plots depict means and respective standard errors of the mean (SEM). P-values were calculated using unpaired student's t test. All presented datasets are representative of at least 3 individual experiments with  $n \geq 3$  mice per group. Normalized MFIs were calculated by dividing the MFIs of each sample by the mean MFI of the respective wt group.

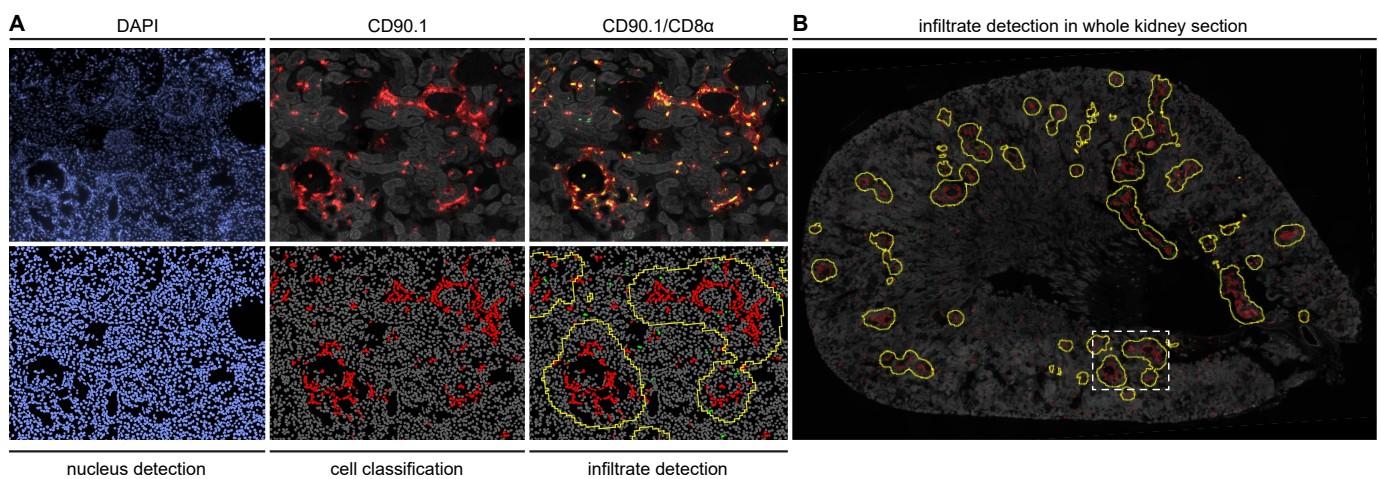

**Figure S7. (A)** Semi-automatic detection of renal T cell infiltrates. Panel on the left depicts identification of cells by nuclear DAPI staining (blue channel; left), classification of OT-1 cells by CD90.1 staining (red channel; center), and automatic detection of infiltrated areas (yellow outlines; right) with cluster detection algorithm implemented in QuPath. **(B)** Histopathology with marked infiltrated areas in an exemplary whole kidney slide of an NOH mouse 35 days after OT-1 transfer and heterologous infection (experimental setup as illustrated in Fig. 1A). Dashed white box marks cut-out shown in (A).

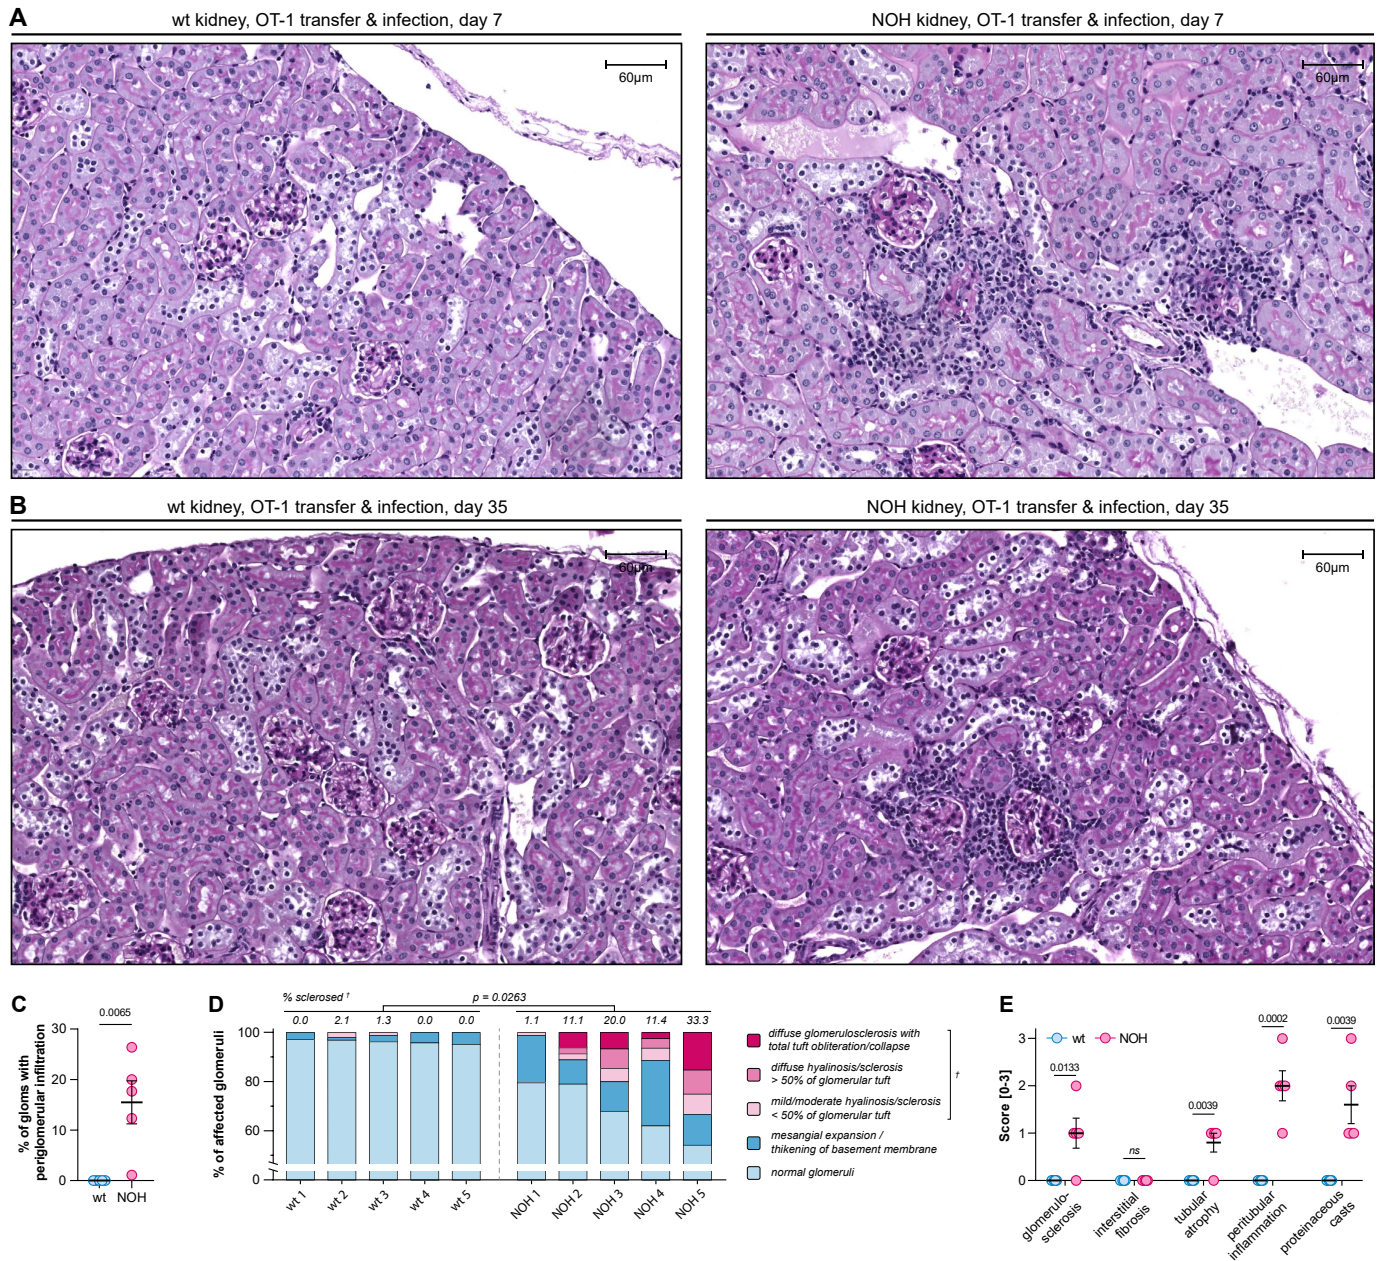

**Figure S8.** (A, B) Periodic acid–Schiff (PAS) stained kidney sections of wt (left) and NOH mice (right), 7 (A) and 35 days (B) after OT-1 cell transfer and infection, showing structural tissue properties (corresponding to Fig. 3). (C) Dot plot depicting percentage of glomeruli with surrounding infiltrations per whole kidney section. (D) Bar plot showing individual fractions of sclerosed glomeruli and severity of sclerosis after 35 days. Scoring was performed on whole kidney section as described in figure legend (76). (E) Combined dot plot comparing histopathological features of structural kidney damage of wt (blue) and NOH (red) mice after 35 days. The features glomerulosclerosis, interstitial fibrosis, tubular atrophy, and peritubular inflammation were scored by fractions of affected glomeruli or cortical area in whole kidney sections, respectively (0: <5%, 1: 5-25%, 2: 25-50%, 3: >50%). Proteinaceous casts were scored by their relative frequency (0: negative, 1: low, 2: moderate, 3: high) in whole kidney sections.

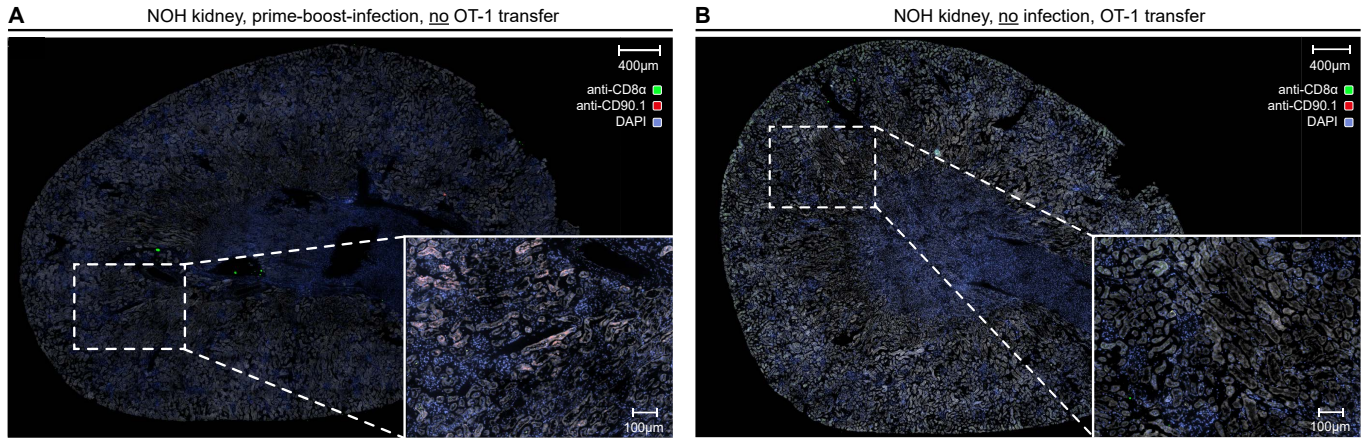

**Figure S9.** (A) Immunofluorescence of whole kidney sections, labelled with FITC-anti-CD8- (green channel) and PE-anti-CD90.1-antibodies (red channel), showing no T cells in NOH mice after prime-boost-infection without prior OT-1 transfer. (B) Immunofluorescence of whole kidney sections, labelled with FITC-anti-CD8- (green channel) and PE-anti-CD90.1-antibodies (red channel), showing no T cells in NOH mice after OT-1 cell transfer without infection.

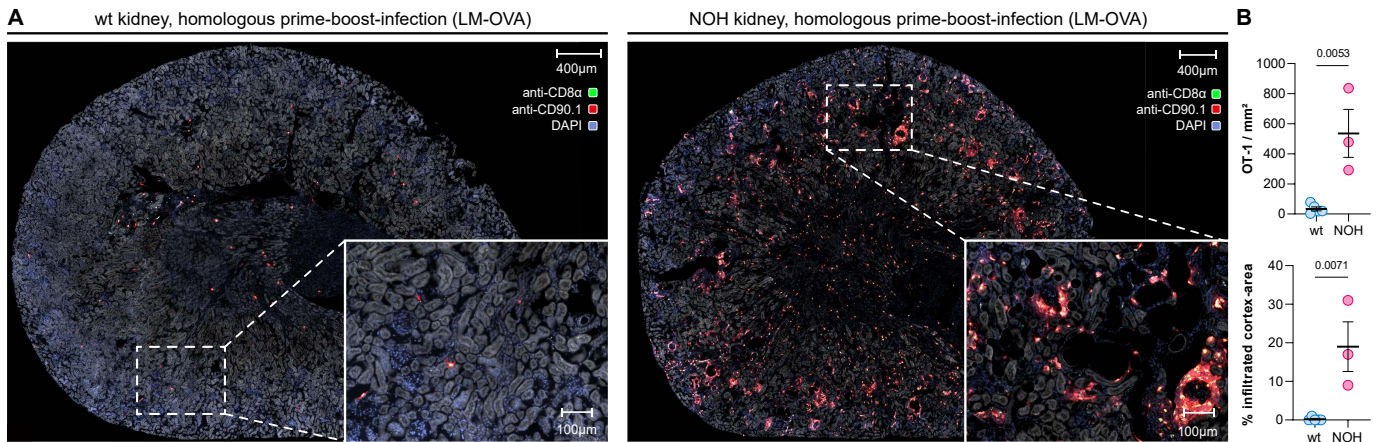

**Figure S10.** (A) Immunofluorescence of whole kidney sections, labelled with FITC-anti-CD8- (green channel) and PE-anti-CD90.1-antibodies (red channel), depicting the CD8<sup>+</sup> T cell infiltration in wt (left) and NOH mice (right) 35 days after OT-1 cell transfer, followed by an homologous prime-boost infection with LM-OVA (day 0: 2,500 cfu; day 21: 250,000 cfu). (B) The OT-1 cell density per mm<sup>2</sup> (upper graph) and the percentage of infiltrated cortex-area (lower-graph) are higher in NOH (red) vs. wt mice (blue) on day 35. Bars and whiskers of dot plots depict means and respective standard errors of the mean (SEM). P-values were calculated using unpaired student's t test. All presented datasets are representative of at least 3 individual experiments with  $n \geq 3$  mice per group.

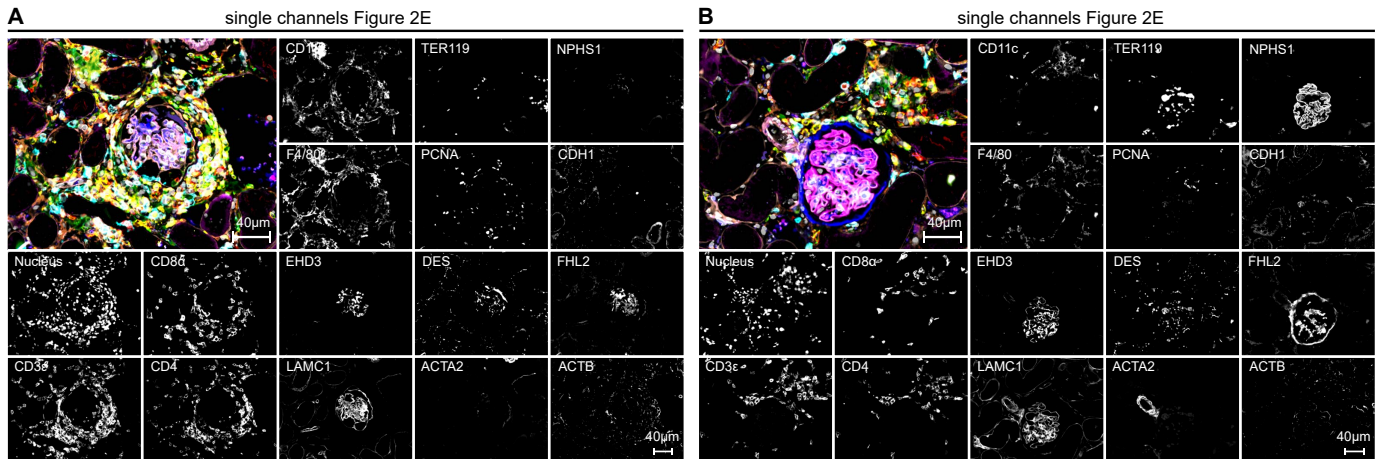

**Figure S11.** Single channels of 16-plex 4i immunofluorescence sections, stained for immune cell entities and structural markers. Corresponding to Fig. 3l.



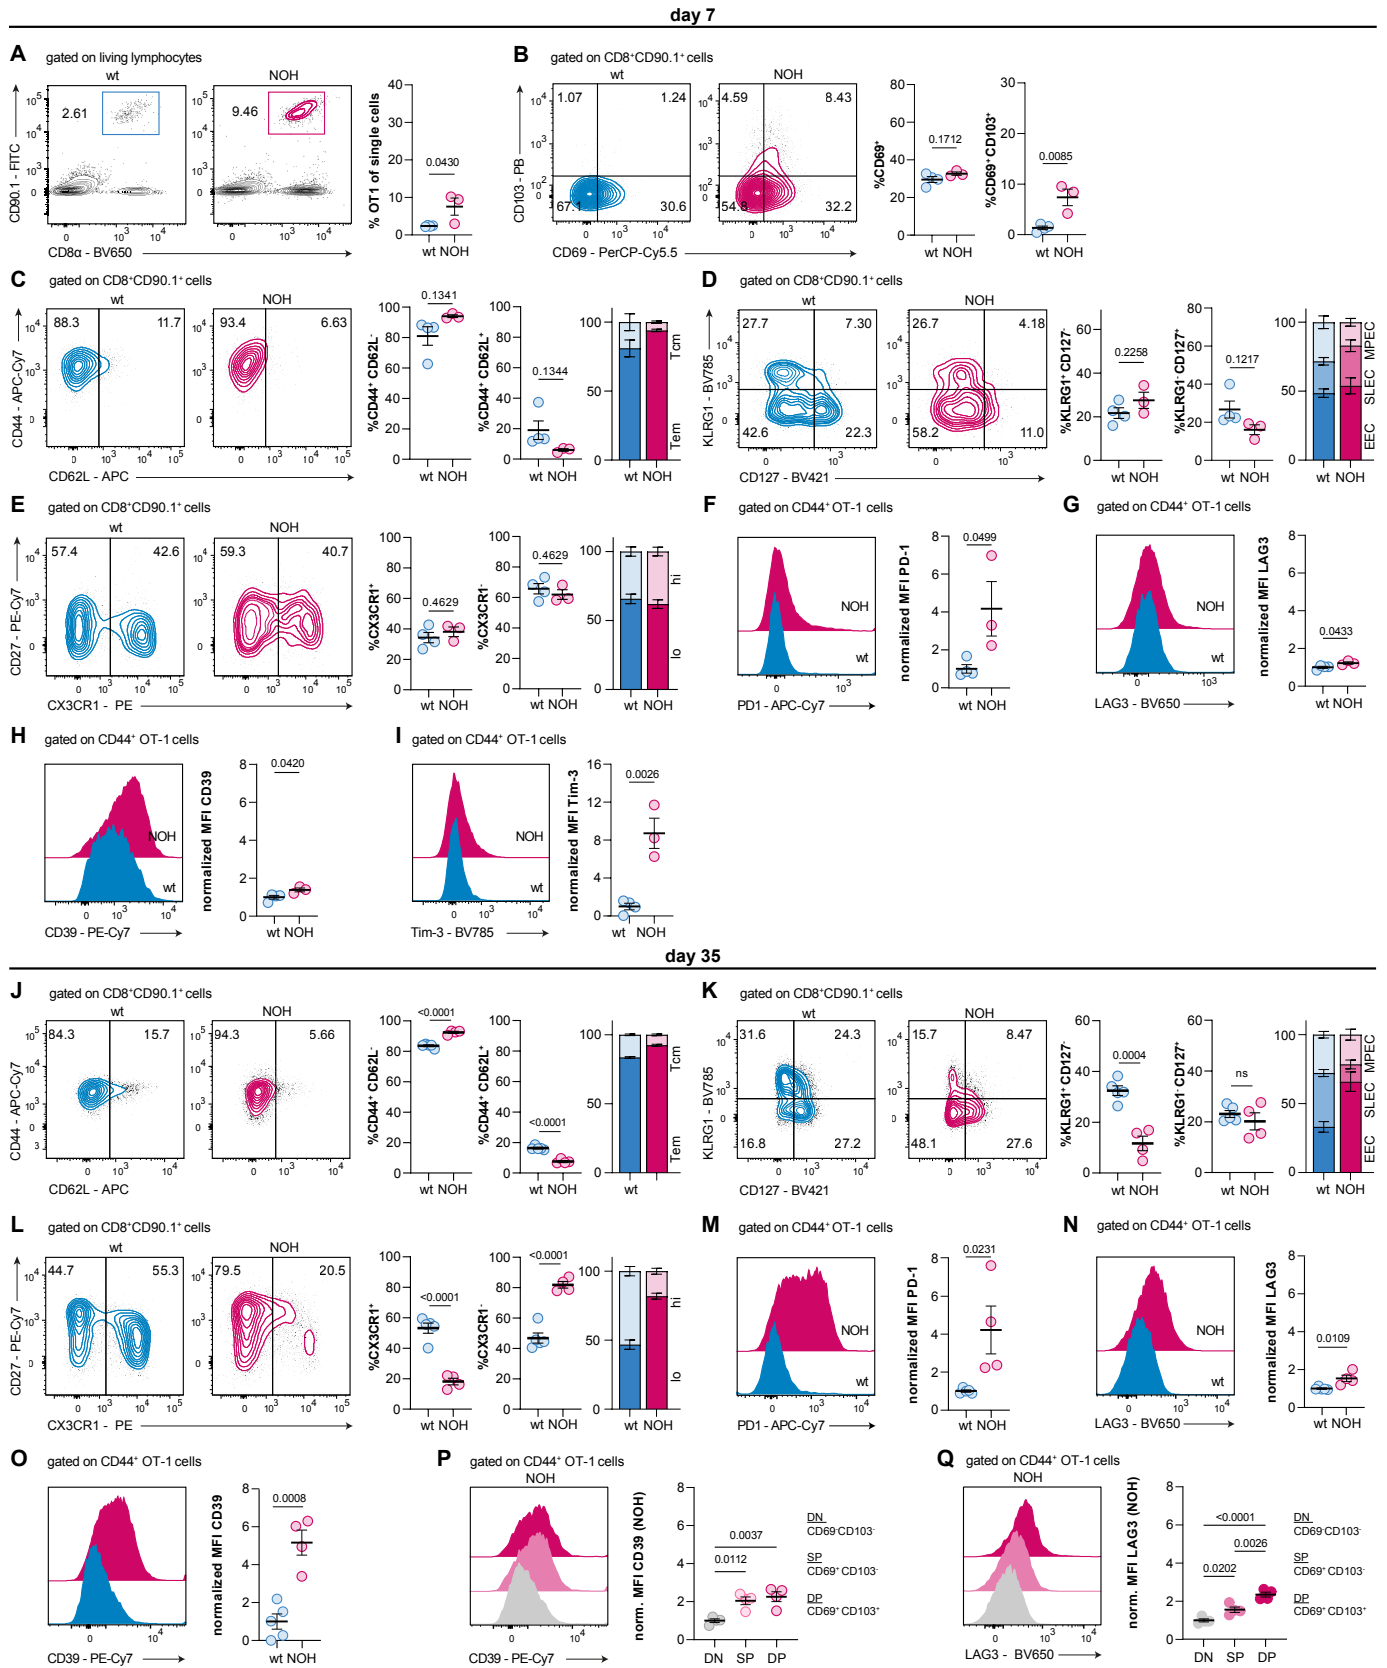

**Figure S12.** Flow cytometry analysis of kidney single cell suspensions 7 days (A-I) and 35 days (J-Q) after adoptive OT-1 cell transfer and infection. (A) Representative flow cytometry plots identifying renal OT-1 cells. Dot plot (right) showing higher percentage of OT-1 CD8<sup>+</sup> T cells in kidneys of NOH (red) vs. wt mice (blue) on day 7. (B) Flow cytometry plots illustrating CD69 and CD103 expression of renal OT-1 cells. Dot plots depicting percentage of CD69<sup>+</sup> cells (left) and double positive CD69<sup>+</sup>CD103<sup>+</sup> OT-1 CD8<sup>+</sup> T<sub>RM</sub> cells (right) in kidneys of NOH (red) vs. wt mice (blue) on day 7. (C, J) Representative flow cytometry plots

illustrating CD44 and CD62L expression of renal OT-1 cells on day 7 (C) and day 35 (J). Dot plots and stacked bar plot depicting higher percentage of CD62L<sup>-</sup> T effector memory (T<sub>EM</sub>) OT-1 cells in NOH (red) vs. wt mice (blue). (D, K) Representative flow cytometry plots illustrating KLRG1 and CD127 expression of renal OT-1 cells on day 7 (D) and day 35 (K). Dot plots and stacked bar plot depicting a lower percentage of KLRG1<sup>+</sup>CD127<sup>-</sup> short lived effector OT-1 cells in NOH (red) vs. wt mice (blue) only on day 35. (E, L) Representative flow cytometry plots illustrating CD27 and CX3CR1 expression of renal OT-1 cells on day 7 (E) and 35 (L). Dot plots and stacked bar plot depicting a lower percentage of CX3CR1<sup>hi</sup> OT-1 cells in NOH (red) vs. wt mice (blue) only on day 35. (F, M) Representative histograms illustrating PD-1 expression of renal OT-1 cells on day 7 (F) and 35 (M). Dot plot comparing normalized MFIs, showing higher PD-1 expression in OT-1 cells from NOH (red) vs. wt mice (blue). (G, N) Representative histograms illustrating LAG3 expression of renal OT-1 cells on day 7 (G) and 35 (N). Dot plot comparing normalized MFIs, showing higher LAG3 expression in OT-1 cells from NOH (red) vs. wt mice (blue). (H, O) Representative histograms illustrating CD39 expression of renal OT-1 cells on day 7 (H) and 35 (O). Dot plot comparing normalized MFIs, showing higher CD39 expression in OT-1 cells from NOH (red) vs. wt mice (blue). (I) Representative histograms illustrating Tim-3 expression of renal OT-1 cells on day 7. Dot plot comparing normalized MFIs, showing higher Tim-3 expression in OT-1 cells from NOH (red) vs. wt mice (blue). (P) Representative histograms illustrating CD39 expression of double positive (CD69<sup>+</sup>CD103<sup>+</sup>), single positive (CD69<sup>+</sup>CD103<sup>-</sup>) and double negative (CD69<sup>-</sup>CD103<sup>-</sup>) renal OT-1 cells in NOH mice on day 35. Dot plot comparing normalized mean fluorescent intensities (MFIs) of the CD39 signal, showing higher CD39 expression in double positive (CD69<sup>+</sup>CD103<sup>+</sup>) and single positive (CD69<sup>+</sup>CD103<sup>-</sup>) vs. double negative (CD69<sup>-</sup>CD103<sup>-</sup>) renal OT-1 cells. (Q) Representative histograms illustrating LAG3 expression of double positive (CD69<sup>+</sup>CD103<sup>+</sup>), single positive (CD69<sup>+</sup>CD103<sup>-</sup>) and double negative (CD69<sup>-</sup>CD103<sup>-</sup>) renal OT-1 cells in NOH mice on day 35. Dot plot comparing normalized mean fluorescent intensities (MFIs) of the LAG3 signal, showing higher LAG3 expression in double positive (CD69<sup>+</sup>CD103<sup>+</sup>) vs. single positive (CD69<sup>+</sup>CD103<sup>-</sup>) and double negative (CD69<sup>-</sup>CD103<sup>-</sup>) renal OT-1 cells. Bars and whiskers of dot plots depict means and respective standard errors of the mean (SEM). P-values were calculated using unpaired student's t test or one-way ANOVA with post hoc Tukey's multiple comparisons method if two or more groups were analyzed. All presented datasets are representative of at least 3 individual experiments with  $n \geq 3$  mice per group. Normalized MFIs were calculated by dividing the MFIs of each sample by the mean MFI of the respective wt group.

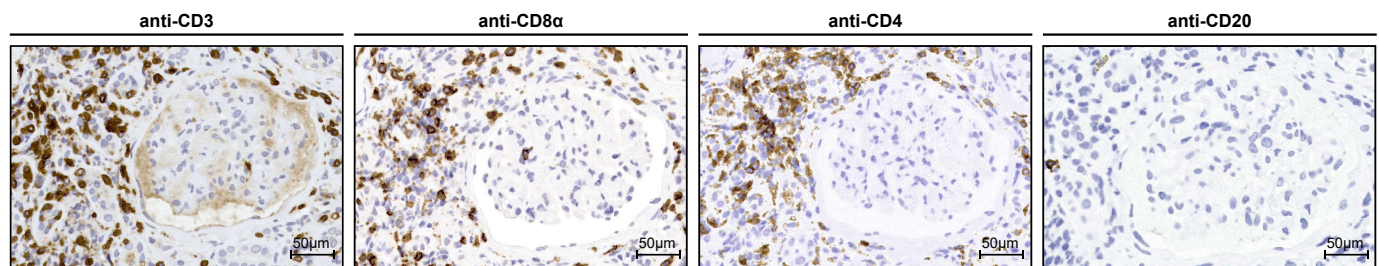

**Figure S13.** Periglomerular infiltrate in a human sample of immune checkpoint inhibitor (ICI)-associated nephritis. T cell infiltrate consists of CD8<sup>+</sup> CTLs and CD4<sup>+</sup> T helper cells. A relevant infiltration of B cells (CD20<sup>+</sup>) was not detected.

## Supplementary Tables

| Fluorophore  | Antibody (clone)                                    | Dilution | Cat. number | Manufacturer |
|--------------|-----------------------------------------------------|----------|-------------|--------------|
| AF700        | CD8 $\beta$ (YTS156.7.7)                            | 1:1000   | 126618      | BioLegend    |
| APC          | CD62L (MEL-14)                                      | 1:200    | 104412      | BioLegend    |
|              | CD8 $\alpha$ (53-6.7)                               | 1:1000   | 120712      | BioLegend    |
|              | MHC I H-2K <sup>b</sup> bound to SIINFEKL (25D1.16) | 1:100    | 141605      | BioLegend    |
|              | CD159c/NKG2A (16A11)                                | 1:200    | 142807      | BioLegend    |
|              | TCRV $\beta$ 5.1, 5.2 (MR9-4)                       | 1:200    | 139505      | BioLegend    |
|              | PD-1 (RMP1-30)                                      | 1:200    | 109117      | BioLegend    |
| APC-Cy7      | CD44 (IM7)                                          | 1:500    | 103028      | BioLegend    |
|              | PD-1 (29F.1A12)                                     | 1:100    | 135223      | BioLegend    |
| BV421 / PB   | CD103 (2E7)                                         | 1:200    | 121421      | BioLegend    |
|              | CD127 (A7R34)                                       | 1:100    | 135023      | BioLegend    |
|              | CD8 $\alpha$ (53-6.7)                               | 1:500    | 100738      | BioLegend    |
|              | CD90.1/Thy1.1 (OX-7)                                | 1:500    | 202529      | BioLegend    |
|              | TNF- $\alpha$ (MP6-XT22)                            | 1:100    | 506328      | BioLegend    |
| BV510        | CD44 (IM7)                                          | 1:800    | 103044      | BioLegend    |
|              | CD8 $\alpha$ (53-6.7)                               | 1:400    | 100752      | BioLegend    |
| BV650        | CD8 $\alpha$ (53-6.7)                               | 1:500    | 100741      | BioLegend    |
|              | LAG3 (C9B7W)                                        | 1:50     | 125227      | BioLegend    |
|              | MHC II I-A/I-E (M5/114.15.2)                        | 1:1000   | 107641      | BioLegend    |
| BV785        | CD4 (GK1.5)                                         | 1:500    | 100453      | BioLegend    |
|              | KLRG1 (2F1)                                         | 1:100    | 138429      | BioLegend    |
|              | Tim-3 (RMT3-23)                                     | 1:100    | 119725      | BioLegend    |
| FITC / AF488 | CD326/Ep-Cam (G8.8)                                 | 1:1500   | 118210      | BioLegend    |
|              | CD90.1/Thy1.1 (OX-7)                                | 1:1000   | 202503      | BioLegend    |
| PE           | CD44 (IM7)                                          | 1:500    | 103007      | BioLegend    |
|              | CD69 (H1.2F3)                                       | 1:200    | 104507      | BioLegend    |
|              | CD8 $\alpha$ (53-6.7)                               | 1:1000   | 100707      | BioLegend    |
|              | CD90.1/Thy1.1 (OX-7)                                | 1:1000   | 202524      | BioLegend    |
|              | CD94 (18d3)                                         | 1:100    | 105507      | BioLegend    |
|              | CD366 / TIM-3 (RM13-23)                             | 1:100    | 119703      | BioLegend    |
|              | CX3CR1 (SA011F11)                                   | 1:200    | 149006      | BioLegend    |
|              | IL-2 (JES6-5H4)                                     | 1:100    | 503807      | BioLegend    |
|              | TCR V $\alpha$ 2 (B20.1)                            | 1:500    | 127808      | BioLegend    |
| PE-Cy7       | CD11c (N418)                                        | 1:1000   | 25-0111-82  | eBioscience  |
|              | CD27 (LG.3A10)                                      | 1:100    | 124216      | BioLegend    |
|              | CD39 (Duha59)                                       | 1:100    | 143805      | BioLegend    |
|              | CD45 (30-F11)                                       | 1:1000   | 25-0451-82  | eBioscience  |
|              | IFN- $\gamma$ (XMG1.2)                              | 1:200    | 505826      | BioLegend    |
| PerCP-Cy5.5  | CD69 (H1.2F3)                                       | 1:200    | 104521      | BioLegend    |
| Purified     | Fc-block ( $\alpha$ CD16/ $\alpha$ CD32)            | 1:200    |             | <i>self</i>  |

Table S1. Antibodies used for flow cytometry analysis.

| Fluorophore  | Antibody (clone)                          | Dilution | Cat. number | Manufacturer |
|--------------|-------------------------------------------|----------|-------------|--------------|
| APC / Cy5    | B220 (RA3-6B2)                            | 1:200    | 103226      | BioLegend    |
|              | CD326/EpCam (G8.8)                        | 1:200    | 118212      | BioLegend    |
|              | CD8 $\alpha$ (53-6.7)                     | 1:200    | 120712      | BioLegend    |
|              | CD90.1/Thy1.1 (OX-7)                      | 1:200    | 202508      | BioLegend    |
|              | MHC class II I-A/I-E (M5/114.15.2)        | 1:500    | 107613      | BioLegend    |
| FITC / AF488 | B220 (RA3-6B2)                            | 1:200    | 103228      | BioLegend    |
|              | CD90.1/Thy1.1 (OX-7)                      | 1:200    | 202503      | BioLegend    |
|              | IgG (H+L) donkey anti-rabbit (polyclonal) | 1:500    | A21206      | Life tech    |

| Fluorophore | Antibody (clone)                         | Dilution | Cat. number | Manufacturer |
|-------------|------------------------------------------|----------|-------------|--------------|
| PE / Cy3    | CD90.1/Thy1.1 (OX-7)                     | 1:500    | 202524      | BioLegend    |
|             | CD103 (QA17A24)                          | 1:200    | 156903      | BioLegend    |
|             | CD274/PD-L1 (MIH6)                       | 1:200    | 153611      | BioLegend    |
|             | IgG (H+L) donkey anti-mouse (polyclonal) | 1:500    | 715-165-151 | Jackson IR   |
| Purified    | Anti-Lysozyme (polyclonal)               | 1:25     | 100-4172    | Rockland     |

**Table S2.** Antibodies used for immunofluorescence imaging.

| Antibody (clone)          | Cat. number | Manufacturer     |
|---------------------------|-------------|------------------|
| ACTA2 / SMA (1A4)         | GA611       | Agilent Dako     |
| NPHS1 (polyclonal)        | GP-N2       | Progene          |
| LAMC1 (EPR21199)          | ab233389    | Abcam            |
| EHD3 (polyclonal)         | HPA049986   | Atlas Antibodies |
| E-Cadherin / CDH1 (4A2C7) | 33-4000     | Invitrogen       |
| ACTB (AC-15)              | A5441       | Merck            |
| PCNA (PC10)               | M0879       | Agilent Dako     |
| FHL2 (polyclonal)         | HPA006028   | Atlas Antibodies |
| F4/80, (D2S9R)            | 70076       | Cell Signalling  |
| CD11c (D1V9Y)             | 97585       | Cell Signalling  |
| CD3ε (D4V8L)              | 99940       | Cell Signalling  |
| CD4 (D7D2Z)               | 25229       | Cell Signalling  |
| CD8α (D4W2Z)              | 98941       | Cell Signalling  |
| Desmin / DES (D33)        | M0760       | Agilent Dako     |
| Ter199 (TER-119)          | 14-5921-82  | Thermo Fisher    |

**Table S3.** Primary antibodies used for iterative indirect immunofluorescence imaging (4i).

| Antibody (clone)   | Cat. number | Manufacturer     |
|--------------------|-------------|------------------|
| CD3 (polyclonal)   | IR503       | Agilent Dako     |
| CD4 (4B12)         | IR649       | Agilent Dako     |
| CD8 (C8/144B)      | IR623       | Agilent Dako     |
| CD20cy (L26)       | IR604       | Agilent Dako     |
| CD69 (polyclonal)  | HPA050525   | Atlas Antibodies |
| CD103 (polyclonal) | HPA036313   | Atlas Antibodies |

**Table S4.** Antibodies used for immune histochemistry on human samples.

| Antibody (clone)                        | Dilution                    | Cat. number | Manufacturer |
|-----------------------------------------|-----------------------------|-------------|--------------|
| B0301 α-mouse Hashtag 1 (M1/42; 30-F11) | 0.5µg/10 <sup>6</sup> cells | 155831      | BioLegend    |
| B0302 α-mouse Hashtag 2 (M1/42; 30-F11) | 0.5µg/10 <sup>6</sup> cells | 155833      | BioLegend    |
| B0303 α-mouse Hashtag 3 (M1/42; 30-F11) | 0.5µg/10 <sup>6</sup> cells | 155835      | BioLegend    |
| B0304 α-mouse Hashtag 4 (M1/42; 30-F11) | 0.5µg/10 <sup>6</sup> cells | 155837      | BioLegend    |
| B0305 α-mouse Hashtag 5 (M1/42; 30-F11) | 0.5µg/10 <sup>6</sup> cells | 155839      | BioLegend    |
| B0306 α-mouse Hashtag 6 (M1/42; 30-F11) | 0.5µg/10 <sup>6</sup> cells | 155831      | BioLegend    |

**Table S5.** Hashtag antibodies used for single cell sequencing.

## References

1. El Nahas A M, et al. Role of growth hormone in the development of experimental renal scarring. *Kidney International*. 1991;40: 29-34.
